# Supplementary material
Source: Research Square preprint supplement (doi:10.21203/rs.3.rs-8881686/v1)
Supplement: Supplementary file 1 [file 06177e0c4c8a48e175894e11.docx]

**Supplementary Information**

**Binding and Toxicological Insights into Direct Yellow 8 and Bovine Serum Albumin: Fluorescence Quenching and Cytotoxicity Studies**

Babita Bisht1, Sangeeta2, Pinki Dey3, Praveen K. Kujur4, Avinash Singh5,Shahnoor Ali6, Sandeep7, Deepa Bisht8, Sanjay Pant1, Mohan Singh Mehata9*

1Photophysics Laboratory, Department of Physics, Centre of Advanced Study, D.S.B. Campus, Kumaun University, Nainital, 263002, India,

2School of Computational and Integrated Sciences, 4Cancer Biology Laboratory, School of Life Sciences, 7School of Life Sciences, Jawaharlal Nehru University, New Delhi-110067 India

3School of Biotechnology and Biomolecular Sciences, University of New South Wales, Sydney 2033, Australia

5Department of Electrical and Computer Engineering, University of Houston, Houston, Texas

6Centre for Applied Research in Electronics (CARE), IIT Delhi, Hauz Khas, New Delhi-110016, India

8 Department of Mathematics, Uttrakhand Open University, Behind Transport Nagar, Teenpani Bypass Road, Haldwani, Nainital, 263139, India

9Laser Spectroscopy Laboratory, Department of Applied Physics, Delhi Technological University, Bawana Road, Delhi, 110042, India

Corresponding author: [msmehata@gmail.com](mailto:msmehata@gmail.com)


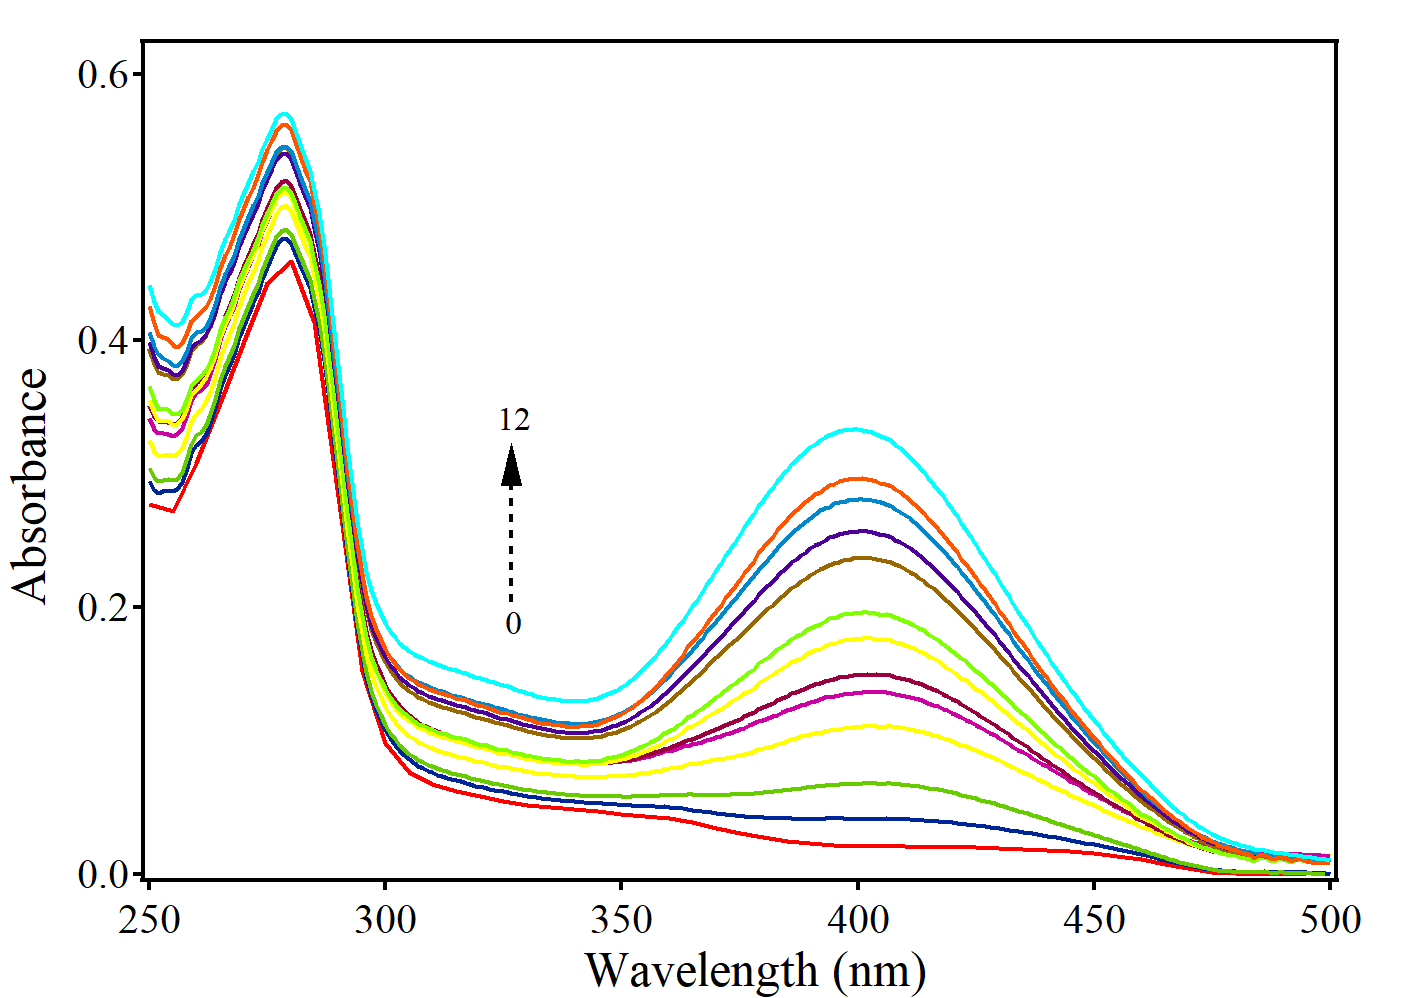


Figure S1: Absorption spectra of BSA in the presence of varying concentrations of DY8 (1 µM – 12 µM). A new band begins to appear at 400 nm, corresponding to the principal absorption band of DY8.
